# Supplementary material
Source: PubMed Central journal article supplement (PMC2866581)

Q9H1D0 TrpV6 human MGEALMIAALYDN--LBAAMVIME----AAPELV----PEPMTSELVEGCTALH--IAVYHQNMNLVALLAR-PASV-----SA--RATGTAFR-----RS-PCN-----LI 83  
 Q91WD2 TrpV6 mouse MGEALMIAALYDN--LBAAMVIME----AAPELV----PEPMTSELVEGCTALH--IAVYHQNVNLVALLAR-GASV-----SA--RATGSVFB-----YR-PHN-----LI 83  
 Q9NQA5 TrpV5 human LGEALMIAALYDN--LBAALVIME----AAPELV----PEPTTCSAFAGCTALH--IAVYHQNVNLVALLAR-PASV-----SA--RATGTAFR-----RS-PFN-----LI 83  
 P69744 TrpV5 mouse LGEALMVAALYDN--LDAAMVIME----AAPELV----TESLCLCFPPVCGCTALH--IAVMYQNVNLVALLAR-GASA-----SA--RATGSAPF-----RS-SHN-----LI 83  
 XP 416530.2 ECaC chicken VGEALMVAALYDN--VBAALALME----AAPELV----HEPMTSELVEGCTALH--IAVYHQNTITLVKALLKR-GANVCG-----TA--QATGHFFR-----RS-SQN-----LL 84  
 NP 001001849.1 ECaC zebrafish LGETALHVAVMDDN--FBAAVALMN----GAPELI----HEPMTSELVHGCTALH--IAVYHQNPNLWEMIKR-GADV-----TTP--RVYGMVFR-----KR-REG-----LF 84  
 Q8NER1 TrpV1 human LTKTCLLKAMLLHLDGQNTIPPLLEIARITDLSLKELV--NASTVSYKKGCTALH--IAIERRNMALVTLLVEN-GADV-----QA--AARGDFFK-----KTKGRF-----GF 93  
 Q704Y3 TrpV1 mouse LTKTCLLKAMLLHLDGQNTIPPLLEIARITDLSLKELV--NASTVSYKKGCTALH--IAIERRNMALVTLLVEN-GADV-----QA--AARGDFFK-----KTKGRF-----GF 93  
 Q8QFN9 TrpV1 chicken LTKTCLLKAMLLHLDGQNTIPPLLEIARITDLSLKELV--NASTVSYKKGCTALH--IAIERRNMALVTLLVEN-GADV-----QA--AARGDFFK-----KTKGRF-----GF 93  
 Q9Y5S1 TrpV2 human LTKTCLMKAVLLKQDGVNACILPQLQIDRDSGNPCPLV--NAQCTDEPYRGGHSALE--IAIEKRSLQCVKLLVEN-GANV-----HA--RACGRFFC-----KG-QGT-----CF 92  
 Q9WTR1 TrpV2 mouse LTKTCLMKAVLLKQDGVNACILPQLQIDRDSGNPCPLV--NAQCTDEPYRGGHSALE--IAIEKRSLQCVKLLVEN-GANV-----HA--RACGRFFC-----KH-QGT-----CF 92  
 XP 415848.2 TrpV2 chicken LTKTCLMKALLLKNGRNLTIPVLLLEIDQKTONPPLV--VACSDCYRGGCTALH--IAIEKRSLDLVKVLLVH-GADV-----HA--RARGEFFR-----KKEGV-----CF 93  
 Q8NET8 TrpV3 human LTKTCLMKALLINPMTKBIVRILLAPAEENDILCRFI--NAETTEAAVEGCTALN--IAIERRQGDIAALLIAA-GADV-----NA--HARGAPFN-----PKYQHE-----GF 93  
 Q8K424 TrpV3 mouse LTKTCLMKALLINPMTKBIVRILLAPAEENDILCRFI--NAETTEAAVEGCTALN--IAIERRQGDIAALLIAA-GADV-----NA--HARGVFFN-----PKYQHE-----GF 93  
 XP 001235155.1 TrpV3 chicken LTKTCLMKALLINMNTNQTIVNMLLSFAEENQILRFI--NAAVTEAAVRCCTALN--IAIERRQFELIQGLIEK-GADV-----NA--HACGIPFN-----PKHKHE-----GF 93  
 Q9HBA0 TrpV4 human LTKTCLPKALLLSMGRNLTIPVLLDIAERTGNMREPI--SPFPRDIYRGGCTALH--IAIERRCKHYVELLVAQ-GADV-----HA--QARGRFFC-----PKLEGG-----YF 93  
 Q9EPK8 TrpV4 mouse LTKTCLPKALLLSMGRNLTIPVLLDIAERTGNMREPI--SPFPRDIYRGGCTALH--IAIERRCKHYVELLVAQ-GADV-----HA--QARGRFFC-----PKLEGG-----YF 93  
 Q9DF83 TrpV4 chicken LTKTCLPKALLLSMGRNLTIPVLLDIAERTGNMREPI--SPFPRDIYRGGCTALH--IAIERRCKHYVELLVEK-GADV-----HA--QARGRFFC-----PKLEGG-----YF 93  
 Q9N3Y9 OCR-4 worm VGEILLTCLFLAGI--FNHMKLLAARLIA--IPFKLI--NDPVLGDEEYGEVLE--MGIYSNNAEPVYLLKS-GADV-----HA--RCGGNFFICDQKQ--RTDHPVEHAIISKHTKPG-----HI 109  
 P90784 OCR-1 worm MGENLLAICLLQGS--ALB-NLIARLLIN--PFPKLI--NDICVSEEEYGLPFL--LAIYVQDAQFSLLLRL-GADL-----NQ--RCYGAPFCADDQKA--RTDLEHEFVVELTKNTNMG-----SM 108  
 O61220 OCR-2 worm MGEIIGCCCLLHAS--DIB-NALVVKILD--YFPKLL--NDIHISEDFYGLPFL--QAIINTDCLVYKFLK-LGADV-----NS--RCYGAPFCADDQKA--RTDLEHEFVVELTKNTNMG-----NM 108  
 Q22374 OCR-3 worm LGENLLHVCMLNLT--ADM-NELVQKQNTY--RFPKIV--NDIFLSEEEYGLPFL--QAIYVHEDLEMVYFLCRK-GADV-----HQ--RCYGAPFCADDQKA--RTDLEHEFVVELTKNTNMG-----OM 108  
 Q9VUD5 nanchung fruitfly VGEILLHCLLHAS--SLB-ADLAKRLLK--FPPKLI--LLVYMSDEEYGEVLE--IAIYVHEDPAMVYLLDA-NADV-----QE--RCGAPFMSAETKFP--RTDSDPHEEYVALPMTNMDG-----YV 108  
 GLEAN3 06793 nanLIKE seaurchin LGEILLHCLFLNAT--ELB-SELAKRIIK--EYPLLV--NDIFPTELLVQGEVCL--PAIYVHEDFTVMVKFLVEN-GANI-----DE--RACGTFFLPDDQKN--TRKDYVHSEVIVVDNKTNMG-----HM 108  
 ENSCINP0000004644 nanLIKE seasquirt LGETALHVCFLNLS--TTB-NMLAKEMMK--VFPNLLV--VDIYVLDSEYGEVLE--MTIANDEDIEMVYFLKQ--RKEINAPLN--LEE--RCCGSPFPADQCKL--LARIQDNKNEAPLLOPETNMG-----LL 116  
 O17469 OSM-9 worm EGENLIHLLNREQ--QVC-NEIARILLK--RFPGMA--NDIYVLDSEYGEVLE--LAIYVHDDFTVLSLLNS-KADV-----NA--RACGNFFLPEDFK-----LNKNTDNG-----YA 96  
 Q9W3W0 inactive fruitfly LGEILLHVLICDS--KVB-ELKARVLLR--VFPNLA--LLVMEGEEVYLGASALE--LSIAYSNNEVALLIEA-GADI-----HQ--RATGSPFPDQKQ-----RANPAKSTIDNG-----LA 98  
 GLEAN3 21148 iavLIKEa seaurchin LGEILLHMFPLDIT--RMB-REIASHLLT--VYPKLA--LLVYEGSDPFFGSALE--MAIYVHDKFVYVQVLLVGRY-KARL-----DE--RATGSPFPDHLK-----DHSVSNKSFNG-----TA 99  
 GLEAN3 09599 iavLIKEb seaurchin VGENIPLHCLYNT--EVH-QAIAKHLIT--LVPKLA--LLVYEGFEYGEVCL--LAIYVHDDLHSAKLLCNC-GARL-----NQ--RATGSPFPDHLK-----DHSVSNKSFNG-----QA 101  
 Q18297 TrpA1 worm MQLLQKHGASITTVQNEDEBETALRPAATGGCTGAVRQLLENDIR--LLLNMKEMGNSALE--LAARSGHDAEYKVLLEN-GANKEAKNSVOKTPIQVAIVESGKLETQORLVA-----TGAVLTKDEBIDCRG-----KGAQT-----SS 114  
 Q72020 TrpA1 fruitfly LKNLIRLGACILKMNNSNLEPFAARYGRYNTVROLLESEKGSFIINESDAGMTPLE--ISGQGHVRYVQVLLLN--GALLNRDHT--GRNPIQLAAMSGVETIILLHS-----VBSBLLD-----VD 117  
 Glean3 15403 VESLIDLGATVNLKMKAKCPLEFAAR--VESLIDLGATVNLKMKAKCPLEFAAR--VESLIDLGATVNLKMKAKCPLEFAAR--DVK--GRTPPHLAAMGGVKTMDILYS-----TBGBLLD-----GD 62  
 XP 782013.2 VESLIDLGATVNLKMKAKCPLEFAARYGRNLSIKRLLDSKIGPNIINBTIDGEGMTALE--IAALFGHQKVVQVLLLR--GALLNKDVK--GRTPPHLAAMGGVKTMDILYS-----TBGBLLD-----GD 117  
 consensus TrpA1 seaurchin VESLIDLGATVNLKMKAKCPLEFAARYGRNLSIKRLLDSKIGPNIINBTIDGEGMTALE--IAALFGHQKVVQVLLLR--GALLNKDVK--GRTPPHLAAMGGVKTMDILYS-----TBGBLLD-----GD 117  
 NP 001007066 TrpA1a zebrafish VKNMLGLEVSLDQKSREKKALEPFAARFGRINTCHRLLLEMTDTRLLNREGDREGIPL--LAAREGHVQVVELLKR--GALFCSQYK--GWSGLHHAASBGVCTMKTILL--SNIKLLN-----KTD 117  
 NP 001007067 TrpA1b zebrafish VKNMLGLEVSLDQKSREKKALEPFAARFGRINTCHRLLLEMTDTRLLNREGDREGIPL--LAAREGHVQVVELLKR--GALFCSQYK--GWSGLHHAASBGVCTMKTILLA--ANVKLLD-----KRN 117  
 XP 418294.2 TrpA1 chicken VNNLGLNVSTYSKSRDKKCPLEFAASVGRINTCRLLIREMKTDRLLNREGDKRGMTPLE--LAAQNGHEKVVQVLLKR--GALFICDVK--GWTALHHAASBGVCTMKTILL--TNVKCTD-----KVD 117  
 Q8BLA8 TrpA1 mouse VNNLGLNVSTYSKSRDKKCPLEFAASVGRINTCRLLIREMKTDRLLNREGDKRGMTPLE--LAAQNGHEKVVQVLLKR--GALFISDHN--GWTALHHAASBGVCTMKTIVLD--TNLKCTD-----RLD 117  
 O75762 TrpA1 human VNNLGLNVSTYSKSRDKKCPLEFAASVGRINTCRLLIREMKTDRLLNREGDKRGMTPLE--LAAQNGHEKVVQVLLKR--GALFISDHN--GWTALHHAASBGVCTMKTIVLD--TNLKCTD-----RLD 117

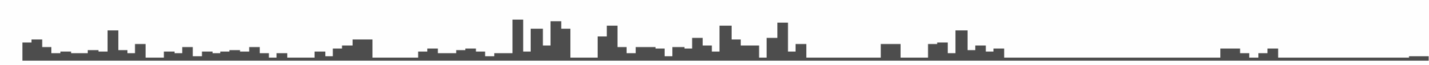

|                                      |                                |       |                          |                   |             |     |
|--------------------------------------|--------------------------------|-------|--------------------------|-------------------|-------------|-----|
| Q9H1D0 TrpV6 human                   | YFGSHPLSFAACVMSSEIVRLLIHHG     | ADIRA | QDGLGNTVLHILLIQPNK       | TFACQMNLLI        | SLDR        | 147 |
| Q9IWD2 TrpV6 mouse                   | YFGSHPLSFAACVMSSEIVRLLIHHG     | ADIRA | QDGLGNTVLHILLIQPNK       | TFACQMNLLI        | SLDR        | 147 |
| Q9NQA5 TrpV5 human                   | YFGSHPLSFAACVMSSEIVRLLIHHG     | ADIRA | QDGLGNTVLHILLIQPNK       | TFACQMNLLI        | SLDR        | 147 |
| P69744 TrpV5 mouse                   | YFGSHPLSFAACVMSSEIVRLLIHHG     | ADIRA | QDGLGNTVLHILLIQPNK       | TFACQMNLLI        | SLDR        | 147 |
| XP 416530.2 BCac chicken             | YFGSHVLSFAACVMSSEIVRLLIHHG     | ADIRA | QDGLGNTVLHILLIQPNK       | TFACQMNLLI        | SLDR        | 148 |
| NP 001001849.1 BCac zebrafish        | YFGSHVLSFAACVMSSEIVRLLIHHG     | ANIRA | QDGRGNTLHLLVLPQPNK       | TFACQIPDFLL       | AQDA        | 148 |
| Q8NER1 TrpV1 human                   | YFGSLPLSLAACTNGLGIKFLLLQMSWDT  | ADISA | RDIVGNTVLHALVEVADHDAADNK | KPVTSMYNEIL       | ILGA        | 165 |
| Q704Y3 TrpV1 mouse                   | YFGSLPLSLAACTNGLAIKFLLLQMSWDT  | ADISA | RDIVGNTVLHALVEVADHDAADNK | KPVTSMYNEIL       | ILGA        | 165 |
| Q8QFN9 TrpV1 chicken                 | YFGSLPLSLAACTNGLCIKFLLLQMSWDT  | ADISA | RDIVGNTVLHALVEVADHDAADNK | KPVTSMYNEIL       | ILGA        | 165 |
| Q9Y5S1 TrpV2 human                   | YFGSLPLSLAACTRQMDVVVYLLLNPHOP  | ASLQA | TDIQGNTVLHALVMIADHDAADNK | KPVTSMYDGLL       | QAGA        | 164 |
| Q9WTR1 TrpV2 mouse                   | YFGSLPLSLAACTRQMDVVVYLLLNPHOP  | ASLEA | TDIQGNTVLHALVMIADHDAADNK | KPVTSMYDGLL       | QAGA        | 164 |
| XP 415848.2 TrpV2 chicken            | YFGSLPLSLAACTRQPEVVVYLLLNPHOK  | ARLQE | TDIQGNTVLHALVMIADHDAADNK | KPVTSMYDGLL       | KAGV        | 165 |
| Q8NET8 TrpV3 human                   | YFGSTPLALAACTRQPIVCLLMSH - RQ  | TDITS | RDIVGNTVLHALVMIADHDAADNK | KPVTSMYDGLL       | LRSG        | 163 |
| Q8K424 TrpV3 mouse                   | YFGSTPLALAACTRQPIVCLLMSH - RQ  | TDITS | RDIVGNTVLHALVMIADHDAADNK | KPVTSMYDGLL       | LRSG        | 163 |
| XP 001235155.1 TrpV3 chicken         | YFGSTPLALAACTRQPDIIELLMEN - TR | TNIAA | QDVRGNTVLHALVMIADHDAADNK | KPVTSMYDGLL       | LKSK        | 163 |
| Q9HBA0 TrpV4 human                   | YFGSLPLSLAACTRQPHIVMLTBNPHKK   | ADMRR | QDVRGNTVLHALVMIADHDAADNK | KPVTSMYDGLL       | LKCA        | 165 |
| Q9EPK8 TrpV4 mouse                   | YFGSLPLSLAACTRQPHIVMLTBNPHKK   | ADMRR | QDVRGNTVLHALVMIADHDAADNK | KPVTSMYDGLL       | LKCA        | 165 |
| Q9DF83 TrpV4 chicken                 | YFGSLPLSLAACTRQPHIVMLTBNPHKK   | ADLRR | QDVRGNTVLHALVMIADHDAADNK | KPVTSMYDGLL       | IKCA        | 165 |
| Q9N3Y9 OCR-4 worm                    | XWGEYPLSFAACLQSGPCIRMLVAHG     | ADVNA | QDINGNTVLHMLVYIYKII      | BMPKML            | SLGAD       | 170 |
| P90784 OCR-1 worm                    | YFGYYPPLSFAICMGDHLFRMLLAKK     | ANLSA | QDINGNTVLHMLVYIYKII      | BMPKML            | EAGGN       | 169 |
| Q61220 OCR-2 worm                    | XWGEYPLSFAACLQSGPCIRMLVAHG     | ANPNA | QDINGNTVLHMLVYIYKII      | BMPKML            | ECGAS       | 169 |
| Q22374 OCR-3 worm                    | XWGEYPLSFAACLQSGPCIRMLVAHG     | ANPNM | QDINGNTVLHMLVYIYKII      | BMPKML            | ELGAN       | 169 |
| Q9VUD5 nanchung fruitfly             | XWGEYPLSFAACLQSGPCIRMLVAHG     | ADPDF | QDINGNTVLHMLVYIYKII      | BMPKML            | EVGTN       | 169 |
| GLEAN3 06793 nanLIKE seaurchin       | YFGYYPPLSFAACLQSGPCIRMLVAHG    | ADVNA | QDINGNTVLHMLVYIYKII      | BMPKML            | ELGAS       | 169 |
| ENSCHNF00000004644 nanLIKE seasquirt | XWGEYPLSFAACLQSGPCIRMLVAHG     | ADISV | QDINGNTVLHMLVYIYKII      | BMPKML            | NQAGE       | 177 |
| O17469 OSM-9 worm                    | YFGYYPPLSFAACLQSGPCIRMLVAHG    | ANPNL | QDINGNTVLHMLVYIYKII      | BMPKML            | AKPAD       | 160 |
| Q9W3W0 inactive fruitfly             | XWGEYPLSFAACLQSGPCIRMLVAHG     | ADPDF | QDINGNTVLHMLVYIYKII      | BMPKML            | KTPAK       | 162 |
| GLEAN3 21148 iavLIKEa seaurchin      | YFGYYPPLSFAACLQSGPCIRMLVAHG    | ADPDF | QDINGNTVLHMLVYIYKII      | BMPKML            | LLFYAIRHN   | 172 |
| GLEAN3 09599 iavLIKEb seaurchin      | YFGYYPPLSFAACLQSGPCIRMLVAHG    | ADPDF | QDINGNTVLHMLVYIYKII      | BMPKML            | IMPANIAIR   | 237 |
| Q18297 TrpA1 worm                    | SDTRKTLHAAAFYGNESIVRYPIAAG     | VTID  | RRDREGKTAFFDIACENDHK     | DVARAPLELDQWKNLMI | PCDVIPLDKHR | 191 |
| Q72020 TrpA1 fruitfly                | KDGNALHBAARAGHVAARVLLLYRG      | CKL   | VYVLDMSAIDVAIYKYF        | EAALAMVTESE       | RANESVM     | 182 |
| glean3 15403                         | DCGNAPILLAAQEGGITAVTYLLLRG     | AAVD  | IVNCADDGIMDIVFDTHNK      | DVAVAIVLHK        | RWDELL      | 127 |
| XP 782013.2                          | DCGNAPILLAAQEGGITAVTYLLLRG     | AAVD  | IVNCADDGIMDIVFDTHNK      | DVAVAIVLHK        | RWDELL      | 182 |
| consensus TrpA1 seaurchin            | DCGNAPILLAAQEGGITAVTYLLLRG     | AAVD  | IVNCADDGIMDIVFDTHNK      | DVAVAIVLHK        | RWDELL      | 182 |
| NP 001007066 TrpA1a zebrafish        | EDGNALHBAARAGHVAARVLLLYRG      | AKI   | LLNKQQAFLHALHNKRR        | EVVLTIRNK         | RWDECLQVF   | 184 |
| NP 001007067 TrpA1b zebrafish        | EDGNALHBAARAGHVAARVLLLYRG      | AKI   | LLNKQQAFLHALHNKRR        | EVVLTIRNK         | RWDECLQVF   | 181 |
| XP 418294.2 TrpA1 chicken            | EGDNALHBAARAGHVAARVLLLYRG      | AKI   | LLNKQQAFLHALHNKRR        | EVVLTIRNK         | RWDECLQVF   | 184 |
| Q8BLA8 TrpA1 mouse                   | EDGNALHBAARAGHVAARVLLLYRG      | ADI   | VLNKQQAFLHALHNKRR        | EVVLTIRNK         | RWDECLQVF   | 184 |
| O75762 TrpA1 human                   | EDGNALHBAARAGHVAARVLLLYRG      | ADI   | VLNKQQAFLHALHNKRR        | EVVLTIRNK         | RWDECLQVF   | 184 |

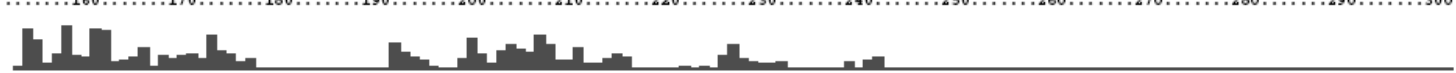

```

Q9H1D0 Trpv6 human      -----HGDR-LQPLDLVFNHQGLTPPKLAGVGGNI-----VNFQHLMCK-----RKHIQWTGPDLSILVLDLLEIDIS 209
Q91WD2 Trpv6 mouse      -----GDR-LKSLRLVFNHQGLTPPKLAGVGGNI-----VNFQHLMCK-----RKHIQWTGPDLSILVLDLLEIDIS 208
Q9NQA5 Trpv5 human      -----HGDR-LQPLDLVFNHQGLTPPKLAGVGGNI-----VNFQHLMCK-----RKHIQWTGPDLSILVLDLLEIDIS 209
P69744 Trpv5 mouse      -----G-DR-LKSLRLVFNHQGLTPPKLAGVGGNI-----VNFQHLMCK-----RKRIQWSPGPDLSILVLDLLEIDIS 208
XP_416530.2 ECac chicken -----SKEG-PRSLRLVFNHQGLTPPKLAGVGGNI-----VNFQHLMCR-----RKHNLSWSPGPDLSILVLDLLEIDIS 210
NP_001001849.1 ECac zebrafish -----EQDS-ALPLDMVFNKGLTPPKLAARDGNV-----VVFQHLVNR-----RKVQWSLGPVSSYLVDLLEIDIS 210
Q8NER1 Trpv1 human      -----KLHP-TLKLRELTNKKGMTPLAALAAGTKI-----GVLANILCREIQ-----EPSCRHLRKPTEWANGPVHSLVDLLEIDIS 238
Q704Y3 Trpv1 mouse      -----KLHP-TLKLRELTNKKGLTPLAALAASSGKI-----GVLANILCREIH-----EPSCRHLRKPTEWANGPVHSLVDLLEIDIS 238
Q8QP9 Trpv1 chicken     -----KINP-ILKLEELTNKKGLTPLAALAAGTKI-----GIFANILPREIK-----EPSCRHLRKPTEWANGPVHSLVDLLEIDIS 238
Q9Y5S1 Trpv2 human      -----RLCP-TVQLEDIKRLQDLTPKLAAREGKI-----EIFRHILCREFS-----G--LSHLRKPTEWANGPVHSLVDLLEIDIS 235
Q9WTR1 Trpv2 mouse      -----RLCP-TVQLEDIKRNQGLTPKLAAREGKI-----EIFRHILCREFS-----GL-YQPLRKPTEWANGPVHSLVDLLEIDIS 236
XP_415848.2 Trpv2 chicken -----KNDP-TVKLEELVNYDGNPLCLAAKTGKV-----EIFRHILCREIK-----IVVYRHLRKPTEWANGPIHVSVDLLEIDIS 238
Q8NET8 Trpv3 human      -----NWELETNRNNDGLTPCLAAKMGKA-----EILKYLREIK-----SKRLRSLRKPFDWANGPVSSLDLLEIDIS 232
Q8K424 Trpv3 mouse      -----NWELETNRNNDGLTPCLAAKMGKA-----EILKYLREIK-----SKPLRSLRKPFDWANGPVSSLDLLEIDIS 232
XP_001235155.1 Trpv3 chicken -----DRNLEKVKKKEGLTPCLAAKTGKL-----EVLKYLREIR-----DKPNRSLRKPFDWANGPVQSLVDLLEIDIS 232
Q9HBA0 Trpv4 human      -----RLFP-DSNLEAVLRNNDGLSPLMMAAKTKI-----GIFQHIIRREVT-----DEDTRBLRKPFDWANGPVYSLVDLLEIDIS 238
Q9EPK8 Trpv4 mouse      -----RLFP-DSNLEAVLRNNDGLSPLMMAAKTKI-----GIFQHIIRREVT-----DEDTRBLRKPFDWANGPVYSLVDLLEIDIS 238
Q9DPS3 Trpv4 chicken     -----KLFP-DTNLEALVRNNDGLSPLMMAAKTKI-----GIFQHIIRREIA-----DEDVRLRKPFDWANGPVYSLVDLLEIDIS 238
Q9N3Y9 OCR-4 worm        -----LHICNRQNLPLTLAAPLAKK-----EMMQRIVEE-----ERVNVWVGRNGQAAPLKHVVDLEIDIS 228
P90784 OCR-1 worm        -----IRLANKQNLALTLAARLAKK-----TMFNKILCL-----ECEVWVWGSQCVAPLTKIDLEIDIS 227
O61220 OCR-2 worm        -----LRTVTKQSLPLTLAARLAKK-----EMFDEILLC-----EGDSVWANGDASSLAPLAKIDLEIDIS 227
Q22374 OCR-3 worm        -----LHVRNHLKPLAALAARLAKK-----HVDLILLEC-----DMDISWANGPVCKAFLPLMVDLEIDIS 227
Q9VUD5 nanchung fruitfly -----IHKNIQNLPLTLAARLGRV-----EMFPFVMSI-----ERBIYQLGSLTCAAPLMLVDLEIDIS 227
GLEAN3_06793 nanLIKE seaurchin -----CSIINYOQYPLCLAAELADI-----EPFESLHIL-----ERQVSWKGDVTCALVPLNLDLIGV-D 226
BNSCINF0000004644_nanLIKE_seasquirt -----VDLSQRNRQGFPLTLAKLSNK-----EMLDHIMEL-----KDISWQPGDVTCAVPLSDVLDLEIDIS 238
O17469 oSM-9 worm        -----PHVWNHAGFPLTLAKLGRK-----QLFSEMLEI-----MKVEPWRPDMTCGAFLPLNLDLIGV-D 217
Q9W3W0 inactive fruitfly -----NGVNHQTGLPLTLACKLGRK-----EVESEMLEL-----SAREPWRNSNITCGVPLNLDLIGV-D 219
GLEAN3_21148 iavLIKEa seaurchin -----YTIANKAGLALQLSPQLGRN-----ELESALLEL-----SSETQWTKGIAYVAPLGLDLSIGV-N 229
GLEAN3_09599 iavLIKEb seaurchin -----RLEHGTVIYQIVNSYSEMILIHVVHRCINPANIARINNGLALALEFRLGRK-----ALEFALLEL-----GSGKQWTKGLSYVAPLGLDLSIGV-N 325
Q18297 TrpA1 worm        -----NPVNMKRRTPPRTLLKFPPLAS-----FVMDNICIKSKE-----ETDQV-SVANFPLDLYMRCVDD-G-T 255
Q72020 TrpA1 fruitfly     -----ALRSDBKPCVTLALASMPKVE-----AVCDKCIKANC-----KDKSPFIKISFAPLQCPFMFAKIDEK- - - 246
Glean3_15403              -----FCTINETN-FIDRLIQRMFDVFT-----FVLDRCQIVSDDL-----EPGEPYNNRRDFKYLQIPVCCRKWLKLD- - - 191
XP_782013.2              -----FCTIDETN-FIDRLIQRMFDVFT-----FVLDRCQIVSDDL-----EPGEPYNN- - - 224
consensus TrpA1 seaurchin -----FCTIDETN-FIDRLIQRMFDVFT-----FVLDRCQIVSDDL-----EPGEPYNNRRDFKYLQIPVCCRKWLKLD- - - 246
NP_001007066 TrpA1a zebrafish -----KPNSTKR-CVMDMIEPLPESFK-----HLLDCITRESSE-----DVNCFNYIEINFRWLQPLQNLKKGMEK-D 249
NP_001007067 TrpA1b zebrafish -----LHNSPNNRCPIEMVYVLPESFQ-----HLLDCITRESDB-----DANQDYHIMNFCWLQAPILQKYYAKLTK- - - 247
XP_418294.2 TrpA1 chicken -----LHNSPNNRCPIEMVYVLPESFQ-----LVLDCITRESSE-----KTSRDFPIEINFRYLQPLALNRLKKEAE-D 250
Q8ELA8 TrpA1 mouse       -----LHNSPNNRCPIEMVYVLPESFQ-----LVLDCITRESSE-----DKSCQDYHIEINFRYLQPLALNRLKKEAE-D 250
O75762 TrpA1 human       -----LHNSPNNRCPIEMVYVLPESFQ-----LVLDCITRESSE-----DKSCRDYHIEINFRYLQPLALNRLKKEAE-D 249
.....310.....320.....330.....340.....350.....360.....370.....380.....390.....400.....410.....420.....430.....440.....450

```

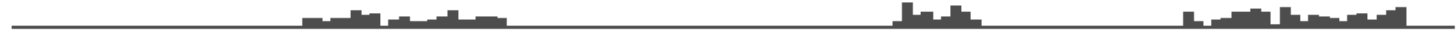

..\*\*

Q9H1D0 TrpV6\_human      **GD**--**EC****LLS****LIITK**-----**KREA**-**R****IL****LD****Q****T****P****V****K****EL****V****S****L****K****W****K****R****G****R****F****I**---**FC****ML****G****A****I****Y****L****L****L****I****C****F****M****C****C****V****R****R****L****K**---**F****R****T****N****N****R****T****S****F**-**R****D****N****L****L****Q****K****L****L****O****R****A****M**----- 301

Q91WD2 TrpV6\_mouse      **GD**--**DC****LLS****LIIVTK**-----**KREA**-**R****IL****LD****Q****T****P****V****K****EL****V****S****L****K****W****K****R****G****R****F****I**---**FC****VL****G****A****I****Y****V****L****L****I****C****F****M****C****C****V****R****R****L****K**---**F****R****T****N****N****R****T****S****F**-**R****D****N****L****L****Q****K****L****L****O****R****A****V**----- 300

Q9NGA5 TrpV5\_human      **GE**--**EL****F****L****S****LLV****V****SD**-----**KREA**-**R****IL****LD****Q****T****P****V****K****EL****V****S****L****K****W****K****R****G****R****F****I**---**FC****LL****A****A****L****Y****L****L****L****M****I****C****F****T****C****C****V****R****R****L****K**---**F****R****G****G****N****R****T****S****F**-**R****D****N****L****L****Q****K****L****L****O****R****A****E**----- 301

P69744 TrpV5\_mouse      **GE**--**EL****F****L****S****LLV****V****SK**-----**KREA**-**R****IL****LD****Q****T****P****V****K****EL****V****S****L****K****W****K****R****G****R****F****I**---**FC****LL****G****A****L****Y****I****F****M****V****C****F****T****C****C****V****R****R****L****K**---**F****R****D****A****N****R****T****H****V**-**R****D****N****L****L****M****B****Q****K****L****L****O****R****A****V**----- 300

XP 416530.2 Ecac\_chicken      **AE**--**DC****F****L****S****LIIV****SK**-----**KREA**-**R****IL****LD****IT****P****V****K****EL****V****S****L****K****W****M****I****G****R****F****I**---**FC****F****L****A****L****Y****V****L****V****M****V****C****F****M****C****C****V****R****R****L****K**---**F****R****S****K****T****S****F**-**R****D****N****L****L****V****Q****R****M****L****O****R****A****V**----- 302

NP 001001849.1 Ecac\_zebrafish      **VD**--**SH****S****LLS****LIAT****SK**-----**KREA**-**R****IL****LD****IT****P****V****K****EL****V****S****L****K****W****N****L****G****R****F****I**---**FC****FL****M****V****L****V****L****L****S****I****F****T****V****C****C****I****N****R****L****K**---**G****L****E****N****T****S****F**-**R****D****N****L****L****S****K****I****K****K****T****F****K****S****L****Q**----- 303

Q6N8R1 TrpV1\_human      **VE**--**KNS****V****L****S****LI****AY****SS**-----**ETPN****R****H****D****M****L****V****E****P****L****N****L****L****Q****D****W****D****R****V****K****K****I**---**F****F****N****F****V****L****V****M****I****F****I****F****M****A****A****N****R****P****V****D**---**G****L****P****F****K****M****E****K**----- 315

Q704Y3 TrpV1\_mouse      **VE**--**KNS****V****L****S****LI****AY****SS**-----**ETPN****R****H****D****M****L****V****E****P****L****N****L****L****Q****D****W****D****R****V****K****K****I**---**F****F****N****F****V****L****V****M****I****F****I****F****M****A****A****N****R****P****V****D**---**G****L****P****F****K****M****L****N**----- 315

Q8QFN9 TrpV1\_chicken      **VE**--**KNS****V****L****S****LI****AY****SS**-----**ETPN****R****H****D****M****L****V****E****P****L****N****L****L****Q****D****W****D****R****V****K****K****I**---**F****F****N****F****V****L****V****M****I****F****I****F****M****A****A****N****R****P****V****D**---**D****K****P****F****F****A****F****G****H**----- 316

Q9Y5S1 TrpV2\_human      **VE**--**KNS****V****L****S****LI****AY****F****H****C**-----**KSP****R****H****M****V****L****E****P****L****N****L****L****Q****A****W****D****L****I****P****R**---**F****F****L****N****F****L****C****N****L****I****N****F****I****F****I****V****A****N****H****O****P****L****K****K**-**O****A****A****F****L****K****A**----- 311

Q9WTR1 TrpV2\_mouse      **VE**--**KNS****V****L****S****LI****AY****F****H****C**-----**KSP****R****H****M****V****L****E****P****L****N****L****L****Q****A****W****D****L****I****P****R**---**F****F****N****F****V****L****V****M****I****F****I****F****I****V****A****N****H****O****P****L****S****Q****A****I****P****S****G****K****A**----- 312

XP 415848.2 TrpV2\_chicken      **VE**--**KNS****V****L****S****LI****AY****SS**-----**ETPN****R****H****M****V****L****E****P****L****N****L****L****Q****D****W****D****R****V****K****K****I**---**F****F****N****F****V****L****V****M****I****F****I****F****M****A****A****N****R****P****V****D**---**G****L****P****F****K****M****L****N**----- 314

Q8N8T8 TrpV3\_human      **T**--**D****N****S****V****L****S****LI****V****Y****N****T**-----**H****I****D****N****R****H****M****L****I****E****P****L****T****L****L****H****M****K****K****F****A****K****N**---**F****F****L****S****P****C****F****F****P****F****N****I****L****L****V****S****N****R****R****E****E****A****L****L****P****H****E****L****A****L****T**----- 310

Q8K424 TrpV3\_mouse      **T**--**D****N****S****V****L****S****LI****V****Y****N****T**-----**H****I****D****N****R****H****M****L****I****E****P****L****T****L****L****H****T****K****K****F****A****K****N**---**F****F****L****S****P****C****F****F****P****F****N****I****L****L****V****S****N****R****R****E****D****E****L****P****H****E****L****A****L****T**----- 310

XP 001235155.1 TrpV3\_chicken      **A**--**D****N****S****V****L****S****LI****V****Y****N****T**-----**H****I****G****N****R****H****M****L****I****E****P****L****S****L****L****M****K****K****R****F****A****R****N**---**L****M****S****G****C****C****F****P****L****N****V****L****L****V****S****N****R****H****E****N****E****A****F****F****L****A****L****T**----- 310

Q9HBA0 TrpV4\_human      **GE**--**EA****V****L****S****LI****V****Y****N****S**-----**K****I****N****N****R****H****M****L****A****V****E****P****I****N****E****L****L****R****K****W****K****F****G****A****V****S**---**F****I****N****V****S****Y****L****C****A****M****V****I****F****L****I****A****N****O****P****L****E**---**G****T****P****P****F****P****Y****R**----- 314

Q9EPK8 TrpV4\_mouse      **GE**--**EV****V****L****S****LI****V****Y****N****S**-----**K****I****N****N****R****H****M****L****A****V****E****P****I****N****E****L****L****R****K****W****K****F****G****A****V****S**---**F****I****N****V****S****Y****L****C****A****M****V****I****F****L****I****A****N****O****P****L****E**---**G****T****P****P****F****P****Y****R**----- 314

Q9DF53 TrpV4\_chicken      **GE**--**EV****V****L****S****LI****V****Y****N****S**-----**K****I****N****N****R****H****M****L****A****V****E****P****I****N****E****L****L****R****K****W****K****F****G****A****V****S**---**F****I****S****V****S****Y****L****C****A****M****I****F****L****I****A****N****R****P****M****E**---**G****P****P****F****P****Y****T**----- 314

Q9N3Y9 OCR-4\_worm      **GS****I****L****Q****K****S****AL****S****L****I****AV****Y****G****E**-----**K****V****E****R****-L****S****L****L****P****H**-**L****L****E****Q****L****V****H****R****K****W****I****A****N****G****R****L****K**---**L****F****A****Q****L****S****M****F****C****I****F****I****C****V****S****C****F****L****R****P****S****F****E****R****O****O****I****A****N****D****L****I****C****F****Y****D****F****K****R****R****F****N****E****S**----- 321

P90784 OCR-1\_worm      **GE****M****D****T****S****AL****S****L****V****Y****G****E**-----**S****I****O****H**-**L****E****L****M****D****G**-**L****I****E****Q****L****I****D****E****K****W****A****N****G****R****A****L****K**---**W****E****R****S****L****L****G****F****I****F****F****C****C****F****V****C****A****M****L****R****P****S****S****A****T****E****H****L****T****R****G****R****I****N****D****E****G****E****S****T****N****S****I****N****L****O****M****H**----- 324

Q61220 OCR-2\_worm      **GE****L****N****E****A****S****AL****S****L****V****Y****G****O**-----**T****V****E****R**-**L****E****L****L****D****G**-**L****L****I****T****L****E****A****K****W****R****A****F****A****K****N**---**M****I****V****S****F****T****A****F****L****Y****I****C****F****V****A****F****T****L****R****P****S****T****E****M****L****T****R****G****M****I****N****R****Y****S****E****F****F****G****R****Y****G****K****N****S****T****L****Q****O****V****I****P****V****I****N****A**----- 332

Q22374 OCR-3\_worm      **GE****L****N****E****A****S****AL****S****L****V****Y****G****D**-----**K****V****D****-L****E****P****F****D****G**-**L****I****E****V****L****E****S****K****W****T****F****G****K****K****O**---**L****M****S****L****A****G****Y****I****F****L****A****V****F****L****A****F****M****R****D****A****H****L****I****D****S****E****D****E****B****E****N****E****K****F****G****M****I****E****L****F****S****N****F****I****N****L****S****E****G****L****S****L****R****E****H****L****A**----- 332

Q9VUD5 nanchung\_fruitfly      **GN****I****N****K****D****S****AL****S****L****V****Y****G****D**-----**K****L****E****R**-**L****E****L****L****D****G**-**V****V****I****D****L****L****K****T****K****W****D****T****C****K****S****R**---**F****I****K****Q****F****V****M****F****A****L****V****L****I****L****F****L****F****P****I****L****R****P****G****D****A****K****D****E****B****E****G****A****N****S****T****A****K****L****L****V****R****Q****N****G****S****D****S****H****L****H****S****K****R****A****T****M**----- 332

GLEAN3 06793 nanLIKE\_seaurchin      **GS****V****N****E****K****S****AL****S****L****I****V****N****Q****S**-----**D****I****D****-L****E****G****L****M****K****G**-**L****M****T****K****L****L****H****B****E****K****W****T****F****G****R****P****Q**---**F****I****L****R****M****G****L****F****I****P****L****L****L****L****T****A****F****V****L****R****P****G****K****D****R****N****A****R****I****N****V****T****D****S****F****G****N****T****V****V****H****K****N****R****C****Y****L****L****Y****S****D**----- 325

BNSCINP0000004644 nanLIKE\_seasquirt      **GS****I****N****K****S****AL****S****I****L****S****A****E**-----**S****N****E****R**-**L****D****M****L****D****G**-**L****L****F****Q****L****L****A****K****W****K****A****F****A****R****K**---**F****I****E****R****G****A****F****F****F****V****L****A****F****I****L****A****V****L****Q****A****P****V****S****L****P****L****K****A****L****S****S****S****V****V****K****L****N****H****R****T****R****F****V****T****N****T****S****T****G****L****V**----- 343

O17469 oSM-9\_worm      **GS****V****N****D****S****AL****S****M****V****I****N****G****S**-----**T****P****E****R**-**L****E****M****I****G****S****E****V****I****C****L****L****A****K****W****K****A****F****A****R****K**---**L****I****E****R****L****V****L****L****V****Q****L****I****L****L****V****V****I****R****P****A****F****V****S****L****P****L****K****H****E****L****D**----- 295

Q9W3W0 inactive\_fruitfly      **GR****N****V****N****S****AL****S****I****L****I****N****G****T**-----**T****P****E****R**-**L****D****M****L****D****G****G****L****I****C****L****L****E****K****W****T****F****A****Q****N****Q**---**F****I****K****R****L****L****L****S****T****H****L****L****C****L****S****V****V****L****R****P****A****H****G****S****A****E****D****E****S****E****G****S****A****S****A****A****L****L****D****I****C****S****D****E****G****L****S****G****G****G****I****Y**----- 322

GLEAN3 21148 iavLIKEa\_seaurchin      **GC****V****N****S****S****AL****S****V****I****V****C****D**-----**T****I****N****N**-**L****K****M****L****E****Q****V****I****D****E****L****L****H****V****K****W****N****L****S****C****K****Q**---**F****A****P****K****L****P****W****A****C****I****B****L****T****M****L****P****L****A****V****Q****L****R****P****A****H****G****L****S****G****S**----- 304

GLEAN3 09599 iavLIKEb\_seaurchin      **GR****L****E****N****S****AL****S****M****V****I****V****F****G**-----**Q****A****O****H**-**L****K****M****L****E****Q****V****V****V****H****L****Q****E****K****W****F****A****R****Q****R**---**L****M****K****F****T****I****T****V****V****Q****L****V****A****M****I****F****S****F****A****R****K****R****I****T****P****D****E****R****A****Q****E****K****K****F****S****G****O****H****F****K****R****I****L**----- 418

O18297 TrpA1\_worm      **GE****L****I****G****C****K****S****A****N****D****E****L****F****K****L****E****K****D****A****Q****Y****A****S****N****V****D****R****V****K****V****P****L****K****L****M****A****D****A****E**-----**K****L****R****L****L****N****H****P****L****S****K****A****L****L****K****Y****K****N****R****I****G****R****P****M**---**V****V****F****A****L****F****M****L****V****P****I****V****S****L****C****V****V****R****T****K****A****P****T****N****V****N****E****E****S****Y****D****S****E****Y**----- 363

Q72020 TrpA1\_fruitfly      **GE****S****I****T****T****A****F****I****P****L****P****A****L****N**-----**M****N****V****T****R****G****V****E****L</**



|                                       |       |     |                      |     |                                     |     |                                            |     |     |     |
|---------------------------------------|-------|-----|----------------------|-----|-------------------------------------|-----|--------------------------------------------|-----|-----|-----|
| Q9H1D0 TrpV6 human                    | VMYFA | --- | RGFQMLGPPFIMICKMIFG  | --- | FLMRFCWLMVVILGFASAFYIIPQTED         | --- | PBELGHPYDIPMALPSTFPELF-LII                 | --- | IDG | 466 |
| Q91WD2 TrpV6 mouse                    | VMYFA | --- | RGFQMLGPPFIMICKMIFG  | --- | FLMRFCWLMVVILGFASAFYIIPQTED         | --- | PDRLGHPYDIPMALPSTFPELF-LII                 | --- | IDG | 465 |
| Q9NQA5 TrpV5 human                    | VMYFT | --- | RGFQMLGPPFIMICKMIFG  | --- | FLMRFCWLMVVILGFASAFYIIPQTED         | --- | PTSLGQPYDIPMALPSTFPELF-LIV                 | --- | IDA | 466 |
| P69744 TrpV5 mouse                    | VMYFA | --- | RGFQMLGPPFIMICKMIFG  | --- | FLMRFCWLMVVILGFASAFYIIPQTED         | --- | PDNLGEPYDIPMALPSTFPELF-LII                 | --- | IDG | 465 |
| XP_416530.2 ECac chicken              | VMYFA | --- | RGFQMLGPPFIMICKMIFG  | --- | FLMRFCWLMVVILGFASAFYIIPQTEK         | --- | PNLIGQPYDIPMALPSTFPELF-LII                 | --- | IDG | 467 |
| MF_001001849.1 ECac zebrafish         | LVYFA | --- | RGFEMLGGPVIVICKRIFG  | --- | ELRKPWMLIIPFLIGSSAALMIFPMICR        | --- | FLALPOYRSPFIIIFPQFVSG-VGQ                  | --- | IDL | 468 |
| Q8NKR1 TrpV1 human                    | MLYNT | --- | RGFQMGIIAVMIKRMILR   | --- | LLCRFMFVIVFLPFGSTAVVYLLERDKNDSE     | --- | ESGSHRWRGACRPPD-SSNNLISGCLLKFPIIG          | --- | MGD | 494 |
| Q704Y3 TrpV1 mouse                    | MLYNT | --- | RGFQMGIIAVMIKRMILR   | --- | LLCRFMFVIVFLPFGSTAVVYLLERDKNDSE     | --- | ESPKKCRGACRPPD-SSNNLISGCLLKFPIIG           | --- | MGD | 494 |
| Q8QFN9 TrpV1 chicken                  | MLYNT | --- | RGFQMGIIAVMIKRMILR   | --- | LLCRFMFVIVFLPFGSTAVVYLLERDNDSCQTN   | --- | SEHAR--GSHTKRRTSNLRYGCLLKFPIIG             | --- | MGD | 494 |
| Q9Y5S1 TrpV2 human                    | MLYNT | --- | RGFHRCIISVMICKVILR   | --- | LLRPELLVYLVLVPLFGFAVALVSLRREARSRKAP | --- | GNHATESVQFMEGQEDBENACRGLLEACLKFKPIIG       | --- | MGE | 495 |
| Q9WTR1 TrpV2 mouse                    | MLYNT | --- | RGFHRCIISVMICKVILR   | --- | LLRPELLVYLVLVPLFGFAVALVSLRREARSRKAP | --- | DGNITTYTEKFLIGQREEPVFVGGILDASLLEKFKPIIG    | --- | MGE | 494 |
| XP_415848.2 TrpV2 chicken             | MLYNT | --- | RGFHRCIISVMICKVILR   | --- | LLRPELLVYIIFLFGFAAALVSLRREARSRKAP   | --- | LQNKSVACMENAESHAMVGGILSVCLLEKFKPIIG        | --- | MGD | 489 |
| Q8NET8 TrpV3 human                    | MLYNT | --- | RGFPSMGMSVMICKVILH   | --- | LVLEKLPFYIIVFLPFGFVALASLIEK         | --- | FKDKDKCSSYGFSDAVLLEKFKPIIG                 | --- | LGD | 475 |
| Q8K424 TrpV3 mouse                    | MLYNT | --- | RGFPSMGMSVMICKVILH   | --- | LVLEKLPFYIIVFLPFGFVALASLIEK         | --- | CSKDKDKCSSYGFSDAVLLEKFKPIIG                | --- | LGD | 475 |
| XP_001235155.1 TrpV3 chicken          | MLYNT | --- | RGFPSMGMSVMICKVILH   | --- | LVLEKLPFYIIVFLPFGFVALASLIEK         | --- | CQNGGRCLSGSLGFLVLMLEKFKPIIG                | --- | LGD | 474 |
| Q9HBA0 TrpV4 human                    | ALYFT | --- | RGLKRLGTYISIMICKILFK | --- | ELPRFLVYLLFPMIGASALVSLNFCANMKVCN    | --- | DQTNCTVPTYPACRDS-EMFSTFLLLEKFKPIIG         | --- | MGD | 493 |
| Q9EPK8 TrpV4 mouse                    | ALYFT | --- | RGLKRLGTYISIMICKILFK | --- | ELPRFLVYLLFPMIGASALVSLNFCANMKVCN    | --- | DQSNCTVPTYPACRDS-EMFSAFLLLEKFKPIIG         | --- | MGD | 493 |
| Q9DFP3 TrpV4 chicken                  | ALYFT | --- | RGLKRLGTYISIMICKILFK | --- | ELPRFLVYLLFPMIGASALVSLNFCPSSESC     | --- | SEDSNCTVPTYPACRDS-EMFSTFLLLEKFKPIIG        | --- | MGD | 493 |
| Q9N3Y9 OCR-4 worm                     | FLYFC | --- | RGFKSVGGPVFLMVKIIR   | --- | LMRPFLLVYLVVVGFSQAFVIVPLGYK         | --- | RDSGGRSEFNISINVAEIVRMFIMLTFE               | --- | TVF | 492 |
| P90784 OCR-1 worm                     | FLYFC | --- | RGFKSVGGPVFLMVKIIR   | --- | LMRPFLLVYLVVVGFSQAFVIVPLGYK         | --- | RDTAIKKIKDPMSEFNINMIVDALLRPFIMLTFE         | --- | TVF | 523 |
| Q61220 OCR-2 worm                     | FLYFC | --- | RGLKRLGTYISIMICKILFK | --- | ELPRFLVYLLFPMIGASALVSLNFCANMKVCN    | --- | SEANVIRKELIDCSSEANEGDINKFNITR              | --- | TVL | 570 |
| Q22374 OCR-3 worm                     | FLYFC | --- | RGLKRLGTYISIMICKILFK | --- | ELPRFLVYLLFPMIGASALVSLNFCANMKVCN    | --- | SEANVIRKELIDCSSEANEGDINKFNITR              | --- | GAL | 542 |
| Q9VUD5 nanchung fruitfly              | FLYFC | --- | RGFKSVGGPVFLMVKIIR   | --- | LMRPFLLVYLVVVGFSQAFVIVPLGYK         | --- | RABIAVQKAHNYTEDDEYIEKFNENMEDGNEAVRMFIMLTFE | --- | GDY | 545 |
| GLEAN3_06793 nanLIKE seaurchin        | FLYFC | --- | RGLKRLGTYISIMICKILFK | --- | ELPRFLVYLLFPMIGASALVSLNFCANMKVCN    | --- | NPSSEEDQDESNMPPNNEISIVAMPIMLTFE            | --- | GDY | 487 |
| ENSCINP00000004644 nanLIKE seaurquirt | FLYFC | --- | RGLKRLGTYISIMICKILFK | --- | ELPRFLVYLLFPMIGASALVSLNFCANMKVCN    | --- | VGAETNFDISAVNMVPMMLTFE                     | --- | QDL | 525 |
| O17469 OSM-9 worm                     | LMFFA | --- | RSKRLGPPVCMYISMIAG   | --- | EMRPAITSAIPLVGFSAQVYFVQKMD          | --- | HPLFSPHPPQSIKMGPIIILGEP                    | --- | D-  | 476 |
| Q9W3W0 inactive fruitfly              | LMFFA | --- | RSKRLGPPVCMYISMIAG   | --- | EMRPAITSAIPLVGFSAQVYFVQKMD          | --- | AKQKLEDINPHACRISGTYITTYNPPSTFPIILFRAIMGGV  | --- | D-  | 487 |
| GLEAN3_21148 iavLIKEa seaurchin       | LLYFY | --- | RANSLGGLVVMFGKMLG    | --- | LLRPELLVYLLFPMIGASALVSLNFCANMKVCN   | --- | PCVQSTMVNYISSTFPIILFRAIMGGV                | --- | N-  | 476 |
| GLEAN3_09599 iavLIKEb seaurchin       | LLYFY | --- | RANSLGGLVVMFGKMLG    | --- | LLRPELLVYLLFPMIGASALVSLNFCANMKVCN   | --- | ANTKSPVYISGEPISGPIIMINGEP                  | --- | N-  | 468 |
| Q18297 TrpA1 worm                     | LLYFY | --- | RANSLGGLVVMFGKMLG    | --- | LLRPELLVYLLFPMIGASALVSLNFCANMKVCN   | --- | NFKFEDWEGEIAITPCMEIFGR                     | --- | SVV | 583 |
| Q72020 TrpA1 fruitfly                 | LLYFY | --- | RANSLGGLVVMFGKMLG    | --- | LLRPELLVYLLFPMIGASALVSLNFCANMKVCN   | --- | NFKFEDWEGEIAITPCMEIFGR                     | --- | SVV | 583 |
| glean3_15403                          | LLYFY | --- | RANSLGGLVVMFGKMLG    | --- | LLRPELLVYLLFPMIGASALVSLNFCANMKVCN   | --- | NFKFEDWEGEIAITPCMEIFGR                     | --- | SVV | 583 |
| XP_782013.2                           | LLYFY | --- | RANSLGGLVVMFGKMLG    | --- | LLRPELLVYLLFPMIGASALVSLNFCANMKVCN   | --- | NFKFEDWEGEIAITPCMEIFGR                     | --- | SVV | 583 |
| consensus TrpA1 seaurchin             | LLYFY | --- | RANSLGGLVVMFGKMLG    | --- | LLRPELLVYLLFPMIGASALVSLNFCANMKVCN   | --- | NFKFEDWEGEIAITPCMEIFGR                     | --- | SVV | 583 |
| MF_001007066 TrpA1a zebrafish         | LLYFY | --- | RANSLGGLVVMFGKMLG    | --- | LLRPELLVYLLFPMIGASALVSLNFCANMKVCN   | --- | NFKFEDWEGEIAITPCMEIFGR                     | --- | SVV | 583 |
| MF_001007067 TrpA1b zebrafish         | LLYFY | --- | RANSLGGLVVMFGKMLG    | --- | LLRPELLVYLLFPMIGASALVSLNFCANMKVCN   | --- | NFKFEDWEGEIAITPCMEIFGR                     | --- | SVV | 583 |
| XP_418294.2 TrpA1 chicken             | FLYFC | --- | RGFKSVGGPVFLMVKIIR   | --- | LMRPFLLVYLVVVGFSQAFVIVPLGYK         | --- | SEANVIRKELIDCSSEANEGDINKFNITR              | --- | TVL | 570 |
| Q8BLA8 TrpA1 mouse                    | FLYFC | --- | RGFKSVGGPVFLMVKIIR   | --- | LMRPFLLVYLVVVGFSQAFVIVPLGYK         | --- | SEANVIRKELIDCSSEANEGDINKFNITR              | --- | TVL | 570 |
| O75762 TrpA1 human                    | FLYFC | --- | RGFKSVGGPVFLMVKIIR   | --- | LMRPFLLVYLVVVGFSQAFVIVPLGYK         | --- | SEANVIRKELIDCSSEANEGDINKFNITR              | --- | TVL | 570 |

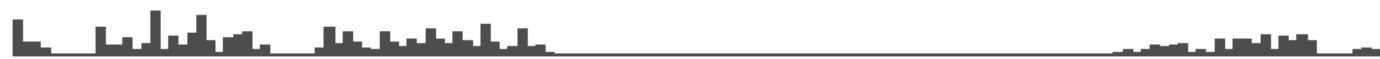

```

Q9H1D0 TrpV6 human           P----ANY-N-VD---LPFMYSVIYAAPAIATLLMLNLLIAMMGDTHWRVAHERDELWRAQIVATTVMLEERKL 531
Q91WD2 TrpV6 mouse           P----ANY-D-VD---LPFMYSVIYAAPAIATLLMLNLLIAMMGDTHWRVAHERDELWRAQIVATTVMLEERKL 530
Q9NQA5 TrpV5 human           P----ANY-D-VD---LPFMYSVIYAFAPAIATLLMLNLFIAMMGDTHWRVAQERDELWRAQIVATTVMLEERKL 531
P69744 TrpV5 mouse           P----ANY-R-VD---LPFMYSVIYAFAPAIATLLMLNLFIAMMGDTHWRVAQERDELWRAQIVATTVMLEERKM 530
XP_416530.2 EcAc chicken     P----ANY-D-VD---LPFMYSVVYFAPAIATLLMLNLLIAMMGDTHWRVAHERDELWRAQIVATTVMLEERKL 532
NP_001001849.1 EcAc zebrafish P----VDE-T-LF---LPFVYVWIVVCFELISNVLLPMLLVAMMSDTHQNRVTVQERDELWRTQVATTVMLEERKL 533
Q8NER1 TrpV1 human           L----EFT-ENVD---FKAVPIIILLAYVILTYILLNMLIALMGETVVKIAQESKNIWKLQRAITILLDEKSP 560
Q704Y3 TrpV1 mouse           L----EFT-ENVD---FKAVPIIILLAYVILTYILLNMLIALMGETVVKIAQESKNIWKLQRAITILLDEKSP 560
Q8QFN9 TrpV1 chicken         L----EFT-ENVR---FKSVFVILLVLYVILTYILLNMLIALMGETVSKIAQESKSIWKLQRAITILLDIENSY 560
Q9Y5S1 TrpV2 human           L----AFO-BQLB---FRGMVLLLLAYVLLTYILLNMLIALMSETVNSVATDSWSIWKLQKAI SVLEMENGY 561
Q9WTR1 TrpV2 mouse           L----AFO-BQLR---FRGMVLLLLAYVLLTYILLNMLIALMSETVNSVATDSWSIWKLQKAI SVLEMENGY 560
XP_415848.2 TrpV2 chicken     L----DFH-BHAR---FRFVFMILLLLPVILTYILLNMLIALMSETVTDISGYSKSVWKLQRAITILLEIKAW 555
Q8NET8 TrpV3 human           L----NIQ-QNSK---XPILFPLLLITVYVILTFVLLNMLIALMGETVENVSKESERIWKLQRAITILEFEKML 541
Q8K424 TrpV3 mouse           L----NIQ-QNST---XPILFPLLLITVYVILTFVLLNMLIALMGETVENVSKESERIWKLQRAITILEFEKML 541
XP_001235155.1 TrpV3_chicken L----EIQ-QNSK---YPVLPFLLLLITVYVILTFVLLNMLIALMGETVEIISKSESHIWKLQRAITILEFEKPL 540
Q9HBA0 TrpV4 human           L----EML-SSAK---YPVVFILLLVTYIILLTFVLLNMLIALMGETVGCVSKESKHIWKLQWATTILLDIERSF 559
Q9EPK8 TrpV4 mouse           L----EML-SSAK---YPVVFILLLVTYIILLTFVLLNMLIALMGETVGCVSKESKHIWKLQWATTILLDIERSF 559
Q9DFS3 TrpV4 chicken         L----EML-ESAK---YPGVFIILLVTYIILLTFVLLNMLIALMGETVGCVSKESKHIWKLQWATTILLDIERSF 559
Q9N3Y9 OCR-4 worm            F----EQLER-CEH---TWIGKILFVYVMLLVLLLLINMLIAMMTNTYTVSSG-HGLEWLRWAAILLMMGCSF 557
P90784 OCR-1 worm            Y----REMSA-CDNFWMKNIKGLIFVIFEPVSIILQPNLLIAMMTRTYETIPL-TRKKNRRWAQVILMLRMGL 591
O61220 OCR-2 worm            Y----RNLAL-CPANIMVWIGKVVVILFELFVSIQPNMLIAMMTRTYETIFQ-IQLEKRRWAQVILMLLELSL 638
Q22374 OCR-3 worm            Y----KNLNE-CKGS-IAPOSQVVFILFELIVVMLLNLLIAMMTRTYEKIAR-TEKEWRRWAQVILMLELGS 609
Q9VUD5 nanchung fruitfly     Y----GAMVS-IG---HEVSAKILFFLPMVIVSVLLVNMMLIAMMGTNYQKIAE-IRNEWCRQWAKIVLVVERSV 610
GLEAN3 06793 nanLIKE seaurchin Y----EKFDE-IR---YPMMAKFLPFVVMVLTLLLVNMLIAMMGTNYQKIAN-ADYEWCRQWAKVVLVLESL 552
BNSCINF0000004644 nanLIKE seaurchin Y----LDFDR-SR---HPLAAKFLFLVVMVLTLLLVNMLIAMMGTNYQKIAN-IRNEWCRQWAKIVLVVERSV 590
O17469 osm-9 worm            Y----EFSFC-AN---YQALTKLFLVVMVLTLLLVNMLIAMMGTNYQKIAN-IRNEWCRQWAKIVLVVERSV 542
Q9W3W0 inactive fruitfly     Y----FDLQD-T---YPNLSKLVFVFMVFPVILLNMLIAMMGTNYQKIAN-IRNEWCRQWAKIVLVVERSV 553
GLEAN3 21148 iavLIKEa seaurchin W----RELYE-CR---MPNFAIILFPIIFMFIQVLMMLNMVIMMARTFDIIKERSRMEWRQWAKIVLVVERSV 534
GLEAN3 09599 iavLIKEb seaurchin N----TK-DE-AR---HFGIASFLMVLPAILVPLLNMLIAMMAKTYSEIMARALMEWRQWAKIVLVQAEETV 648
Q18297 TrpA1 worm            FHGETTAEKMPGPARTAVACALFPFPCIMYILLMNLVGLAVDDIKGVQEKAEKRIAMQVVLVQLIEASL 609
Q7Z020 TrpA1 fruitfly        YV---NTYIRDQ---LKVPMTRFLILSVFMILMPILLMNLVGLAVGDIESVRNNAQLKRIAMQVVLVTELERKL 598
glean3 15403                  FV---LPMYDDDDYTHQYSFPALIFLLALCVLLPILLMNLVGLAVGDIAAVQRDAQLKRIAMQVQLVTVNVTREL 509
XP_782013.2                  FV---LPMYDDDDYTHQYSFPALIFLLALCVLLPILLMNLVGLAVGDIAAVQRDAQLKRIAMQVQLVTVNVTREL 532
consensus TrpA1 seaurchin     FV---LPMYDDDDYTHQYSFPALIFLLALCVLLPILLMNLVGLAVGDIAAVQRDAQLKRIAMQVQLVTVNVTREL 564
NP_001007066 TrpA1a zebrafish FM---KPVLCGD---LPPFLLLAIFVVFVLLVPLLMLNMLVGLAVGDIABVQTNACLKRIAMQVLELSTNLEERL 559
NP_001007067 TrpA1b zebrafish FL---NSYLSGH---MAFFAITVYVYVVFVLLMPLLMLNMLVGLAVGDIABVQRNAAELKRIAMQVLELSTALEERL 558
XP_418294.2 TrpA1 chicken     FL---DPLLSSE---LPPVPLSTVYLIIFPLIPLLMLNMLVGLAVGDIABVQYAAALKRIAMQVLELSTNLEERL 562
Q8BLA8 TrpA1 mouse           FL---EPLFRME---LAPVPLPGQLIAPFMFVPIVLMNMLVGLAVGDIABVQKHAALKRIAMQVLELSTNLEERL 564
O75762 TrpA1 human           FL---EPLFRME---LAPVPLSAQVLVSPVPIVLMNMLVGLAVGDIABVQKHAALKRIAMQVLELSTNLEERL 562
.....910.....920.....930.....940.....950.....960.....970.....

```

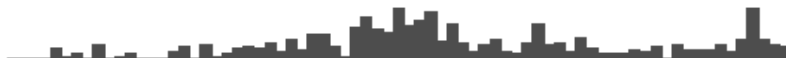

Supplement: dne0032-0001-s01.pdf [file dne0032-0001-s01.pdf]
