# Supplementary material
Source: PubMed Central journal article supplement (PMC2866581)
Supplement: dne0032-0001-s02.pdf [file dne0032-0001-s02.pdf]

```

ENSCHAV0000017823 CB_pacific_sea_squirt
Q51070 CB sea squirt
XP_001510779 Cbl platypus
P21354 Cbl human
XP_001520503 Cbl platypus
P14972 Cbl human
Q9D9Y3 LPA-3 human
Q9D9W0 LPA-2 human
Q92612 LPA-1 human
Q92977 S1P-4 human
Q9H228 S1P-5 human
Q9114 S1P-3 human
P21453 S1P-1 human
Q92500 S1P-2 human
P22274 Adenosine Ala human
P22275 Adenosine Alb human
GLBAN1_08789 Adenosine sea_urchin
P10542 Adenosine Al human
P21765 Adenosine A2 human
GLBAN1_22867 sea_urchin
P41594 D2-1like fruitfly
P21728 D1 human
P21918 D5 human
GLBAN1_11320 sea_urchin
P21917 D4 human
P21462 D3 human
GLBAN1_22864 sea_urchin
Q91944 D2-1like fruitfly
P14414 D2 human
GLBAN1_24900 sea_urchin
GLBAN1_28251 sea_urchin
ENSCIMF0000011119 EDG-like-a sea_squirt
ENSCIMF0000014712 EDG-like-b sea_squirt
ENSCHAV0000010118K-EDG-like_pacific_sea_squirt
1.....10.....10.....20.....40.....50.....60.....70.....80.....90.....100.....110.....120.....140.....150

```

```

ENSCHAV0000017823 CB_pacific_sea_squirt
Q51070 CB sea squirt
XP_001510779 Cbl platypus
P21354 Cbl human
XP_001520503 Cbl platypus
P14972 Cbl human
Q9D9Y3 LPA-3 human
Q9D9W0 LPA-2 human
Q92612 LPA-1 human
Q92977 S1P-4 human
Q9H228 S1P-5 human
Q9114 S1P-3 human
P21453 S1P-1 human
Q92500 S1P-2 human
P22274 Adenosine Ala human
P22275 Adenosine Alb human
GLBAN1_08789 Adenosine sea_urchin
P10542 Adenosine Al human
P21765 Adenosine A2 human
GLBAN1_22867 sea_urchin
P41594 D2-1like fruitfly
P21728 D1 human
P21918 D5 human
GLBAN1_11320 sea_urchin
P21917 D4 human
P21462 D3 human
GLBAN1_22864 sea_urchin
P14414 D2 human
GLBAN1_24900 sea_urchin
GLBAN1_28251 sea_urchin
ENSCIMF0000011119 EDG-like-a sea_squirt
ENSCIMF0000014712 EDG-like-b sea_squirt
ENSCHAV0000010118K-EDG-like_pacific_sea_squirt
1.....160.....170.....180.....190.....200.....210.....220.....240.....250.....260.....270.....280.....290.....300

```

|                                                 |                                               |                          |                                           |     |
|-------------------------------------------------|-----------------------------------------------|--------------------------|-------------------------------------------|-----|
| ENSCSAVP00000017833 CB_pacific_sea_squirt       | EHEK--P-IG-RRRAVLLVLLNHNKSGAALLIAPV-AGNVCVC   | HCVCETATLDGSDNCPHPSGSRYV | FPPIITNDII-ITCVVIPPVIVIGLIVLCH-AGVFWKVSHP | 244 |
| Q8IU30 CB sea squirt                            | EHEK--P-IG-RRRAVLLVLLNHNKSGAALLIAPV-AGNVCVC   | HCVCETATLDGSDNCPHPSGSRYV | FPPIITNDII-ITCVVIPPVIVIGLIVLCH-AGVFWKVSHP | 243 |
| IP 001310779 CBI_platypus                       | AYER--I-VT-RPKAVVAPCVMMGTAIVIAVLPL-LGKNCCK    | ---                      | PLIDETILMPWIGVTS-VL-LLPVVAHNYIIKKAHSA     | 306 |
| P21554 CBI human                                | AYER--I-VT-RPKAVVAPCVMMGTAIVIAVLPL-LGKNCCK    | ---                      | PLIDETILMPWIGVTS-VL-LLPVVAHNYIIKKAHSA     | 305 |
| IP 001320568 CB2_platypus                       | RYFA--I-LT-PGRALAAALAMMLATAAVSFLPL-VGMGCGG    | ---                      | PPVWVDFP--LLSWIVLPLGLLALVLAHAYIIRLARRH    | 228 |
| P34972 CB2 human                                | RYFA--I-LT-PGRALAAALAMMLATAAVSFLPL-VGMGCGG    | ---                      | PPVWVDFP--LLSWIVLPLGLLALVLAHAYIIRLARRH    | 228 |
| Q9UBV5 LPA-3 human                              | WHS--R-LR-FKEVVELLIVLVNAIAPFMSVAPF-LGMKCLC    | ---                      | PLIPRSHLLSLLWLLFIAPLPSS--IYVTHGVNKAHQHV   | 220 |
| Q9HBM0 LPA-2 human                              | WHS--R-LR-FKEVVELLIVLVNAIAPFMSVAPF-LGMKCLC    | ---                      | PLIPRSHLLSLLWLLFIAPLPSS--IYVTHGVNKAHQHV   | 217 |
| Q92633 LPA-1 human                              | LHT--R-NH-NRRVVVVIVIVIKNAIVVGMGAIAPV-VGNKCLC  | ---                      | APLRSRSLAYV-AISSLV-PLNVAVMREIIPKTRERF     | 219 |
| O95977 SIP-4 human                              | AESG--A-EK-TSRVNGPIGLCMLLAALGLMLPL-LGKNCIC    | ---                      | APLRSRSLAYV-AISSLV-PLNVAVMREIIPKTRERF     | 236 |
| Q9H228 SIP-5 human                              | FAFV--S-RGRRLMMAAANGVSLGLGLPA-LGKNCICG        | ---                      | APLRSRSLAYV-AISSLV-PLNVAVMREIIPKTRERF     | 234 |
| O95136 SIP-2 human                              | LYGS--DK-SCRHLLLIGASMLISLVGLGLPI-LGKNCICG     | ---                      | APLRSRSLAYV-AISSLV-PLNVAVMREIIPKTRERF     | 223 |
| P21453 SIP-1 human                              | LHNG--SN-NPRLPLLSACVWISLILGLGLPI-LGKNCIC      | ---                      | APLRSRSLAYV-AISSLV-PLNVAVMREIIPKTRERF     | 220 |
| Q99500 SIP-3 human                              | LYCA--NK-RBRVPLLIQHCWLIAPLGLALPI-LGKNCICG     | ---                      | APLRSRSLAYV-AISSLV-PLNVAVMREIIPKTRERF     | 232 |
| P29274 Adenosine A2a human                      | RYNG--E-VT-GTRAGIIAICVWISPAIGLPLP-LGKNCIC     | CPKRGKNSGCGGCGVA         | CLPFCVPHNNMVVNPFPACVLPVLLHMLGVLEIFLAAERQL | 208 |
| P29275 Adenosine A2b human                      | RYNS--E-VT-GTRARGVIAVLVWVIAFGIGLFP-LGKNCIC    | SAANNCTEPWGITNESCLVFC    | LPENVVPHNNMVVNPFPACVLPVLLHMLGVLEIFLAAERQL | 213 |
| GLEAN3 08789 Adenosine sea urchin               | RYER--Y-AT-SRCAHILILATVWVIAFGIGLPL-PGKNNK     | ---                      | BEIDLENNVNPFPACVLPVLLHMLGVLEIFLAAERQL     | 209 |
| P30542 Adenosine A1 human                       | RYER--Y-VT-PRRRAVAIAGCWLISPVVGLPLP-PGKNNK     | AVERANAANGSHGEPVIRCEPE   | KVISMEHNVNPFPACVLPVLLHMLGVLEIFLAAERQL     | 211 |
| P33765 Adenosine A3 human                       | RYER--Y-VT-PRRRAVAIAGCWLISPVVGLPLP-PGKNNK     | ---                      | KVISMEHNVNPFPACVLPVLLHMLGVLEIFLAAERQL     | 208 |
| GLEAN3 21588 sea urchin                         | EHEL--I-VT-PREALLVIVGHWLISPAIAGVPL-PGARPP     | ---                      | LSIDN-VPPVFGSPFIPLIIVLIVLIRIIVGVEV        | 230 |
| GLEAN3 22693 sea urchin                         | RYCH--K-MT-FEMLIMVAIVWVIAFGIGLFP-LS-RET       | ---                      | LNENL-AVIGSIFPIFESIMLITARIIVREKQ          | 245 |
| P41596 D1-like fruitfly                         | RYER--R-VT-RVAVVIAIAGWVIAFGIGLPLP-LGKNCIC     | ---                      | PLIPRSHLLSLLWLLFIAPLPSS--IYVTHGVNKAHQHV   | 226 |
| P21728 D1 human                                 | RYER--K-MT-PEAAPFILLIWAIVWVIAFGIGLPLP-LGKNCIC | ---                      | PLIPRSHLLSLLWLLFIAPLPSS--IYVTHGVNKAHQHV   | 245 |
| P21918 D5 human                                 | RYER--K-MT-PEAAPFILLIWAIVWVIAFGIGLPLP-LGKNCIC | ---                      | PLIPRSHLLSLLWLLFIAPLPSS--IYVTHGVNKAHQHV   | 245 |
| GLEAN3 11320 sea urchin                         | SYQY--R-VN-ATNAIILIVVWVIAFGIGLPLP-LGKNCIC     | ---                      | PLIPRSHLLSLLWLLFIAPLPSS--IYVTHGVNKAHQHV   | 256 |
| P21917 D4 human                                 | RYNR--O-GG-SRRCLLIGATVWVIAFGIGLPLP-LGKNCIC    | ---                      | PLIPRSHLLSLLWLLFIAPLPSS--IYVTHGVNKAHQHV   | 224 |
| P35462 D3 human                                 | RYCH--O-GG-SRRCLLIGATVWVIAFGIGLPLP-LGKNCIC    | ---                      | PLIPRSHLLSLLWLLFIAPLPSS--IYVTHGVNKAHQHV   | 223 |
| GLEAN3 22694 sea urchin                         | RYCH--O-GG-SRRCLLIGATVWVIAFGIGLPLP-LGKNCIC    | ---                      | PLIPRSHLLSLLWLLFIAPLPSS--IYVTHGVNKAHQHV   | 219 |
| Q8IS44 D2-like fruitfly                         | RYAK--R-MT-KRMVAMILCVKGNALISPLIPLGKNCIC       | ---                      | PLIPRSHLLSLLWLLFIAPLPSS--IYVTHGVNKAHQHV   | 286 |
| P14416 D2 human                                 | RYAK--R-MT-KRMVAMILCVKGNALISPLIPLGKNCIC       | ---                      | PLIPRSHLLSLLWLLFIAPLPSS--IYVTHGVNKAHQHV   | 264 |
| GLEAN3 24900 sea urchin                         | LYNT--R-YSRKRVVVMISIVWVIAFGIGLPLP-LGKNCIC     | ---                      | PLIPRSHLLSLLWLLFIAPLPSS--IYVTHGVNKAHQHV   | 220 |
| GLEAN3 28351 sea urchin                         | RYET--R-VT-KRMALILIVVWVIAFGIGLPLP-LGKNCIC     | ---                      | PLIPRSHLLSLLWLLFIAPLPSS--IYVTHGVNKAHQHV   | 256 |
| ENSCINP00000012189 EDG-like-a sea squirt        | RYET--Y-PT-NRCAALIVLIVWVIAFGIGLPLP-LGKNCIC    | DPCTCFEDAMVCDKMSGCGP     | TPFSKSLIV--GYSYFVVLSIANVGLMAIFASVRRH      | 255 |
| ENSCINP00000014702 EDG-like-b sea squirt        | RYNR--I-LR-RVILLIILALISVGMVPLVPLVGMSCCA       | HWCCRNMLCIEKASISGCGS     | QSPFPTKSH--ILAGVWVPLISVALMGPHALERIVKCK    | 242 |
| ENSCSAVP00000006186 EDG-like_pacific_sea_squirt | RYNR--I-LR-RVILLIILALISVGMVPLVPLVGMSCCA       | HWCCRNMLCIEKASISGCGS     | QSPFPTKSH--ILAGVWVPLISVALMGPHALERIVKCK    | 241 |

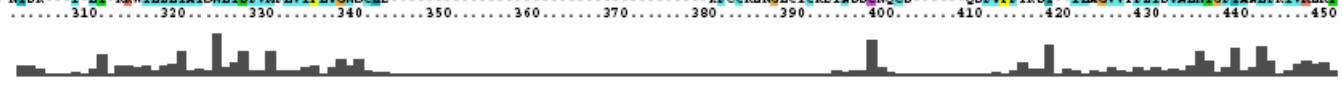

|                                                 |     |     |
|-------------------------------------------------|-----|-----|
| ENSCSAVP00000017833 CB_pacific_sea_squirt       | A-  | 245 |
| Q8IU30 CB sea squirt                            | A-  | 244 |
| IP 001310779 CBI_platypus                       | V-  | 307 |
| P21554 CBI human                                | V-  | 306 |
| IP 001320568 CB2_platypus                       | A-  | 229 |
| P34972 CB2 human                                | A-  | 228 |
| Q9UBV5 LPA-3 human                              | N-  | 218 |
| Q9HBM0 LPA-2 human                              | C-  | 220 |
| Q92633 LPA-1 human                              | M-  | 237 |
| O95977 SIP-4 human                              | C-  | 235 |
| Q9H228 SIP-5 human                              | R-  | 224 |
| O95136 SIP-2 human                              | A-  | 221 |
| P21453 SIP-1 human                              | R-  | 233 |
| Q99500 SIP-3 human                              | R-  | 227 |
| P29274 Adenosine A2a human                      | E-  | 209 |
| P29275 Adenosine A2b human                      | C-  | 214 |
| GLEAN3 08789 Adenosine sea urchin               | S-  | 210 |
| P30542 Adenosine A1 human                       | N-  | 212 |
| P33765 Adenosine A3 human                       | D-  | 209 |
| GLEAN3 21588 sea urchin                         | E-  | 231 |
| GLEAN3 22693 sea urchin                         | E-  | 247 |
| P41596 D1-like fruitfly                         | K-  | 342 |
| P21728 D1 human                                 | E-  | 226 |
| P21918 D5 human                                 | R-  | 257 |
| GLEAN3 11320 sea urchin                         | R-  | 224 |
| P21917 D4 human                                 | V-  | 225 |
| P35462 D3 human                                 | R-  | 220 |
| GLEAN3 22694 sea urchin                         | R-  | 287 |
| Q8IS44 D2-like fruitfly                         | R-  | 265 |
| P14416 D2 human                                 | E-  | 221 |
| GLEAN3 24900 sea urchin                         | R-  | 307 |
| GLEAN3 28351 sea urchin                         | --- | 250 |
| ENSCINP00000012189 EDG-like-a sea squirt        | --- | 255 |
| ENSCINP00000014702 EDG-like-b sea squirt        | --- | 242 |
| ENSCSAVP00000006186 EDG-like_pacific_sea_squirt | --- | 241 |
